# Supplementary material for: PICaSSO Histologic Remission Index (PHRI) in ulcerative colitis: development of a novel simplified histological score for monitoring mucosal healing and predicting clinical outcomes and its applicability in an artificial intelligence system
Source: HighWire-hosted journal article supplement (doi:10.1136/gutjnl-2021-326376), 2022-02-16
Supplement: gutjnl-2021-326376supp001_data_supplement.pdf [file gutjnl-2021-326376supp001_data_supplement.pdf]

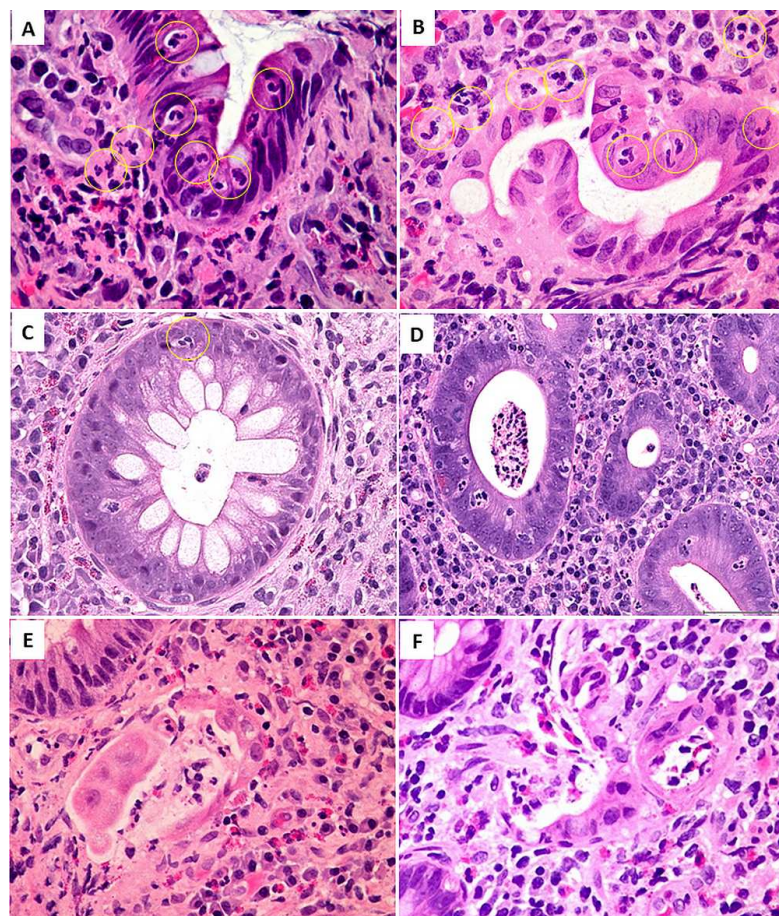

**Supplementary Figure 1.** Examples of active (neutrophilic) inflammation in IBD. A. Neutrophil (within yellow circles) infiltration in surface epithelium ( $\times 600$ ). B. Neutrophil (within yellow circles) infiltration in cryptal epithelium (cryptitis) ( $\times 600$ ) and in lamina propria. C. A single neutrophil infiltration in cryptal epithelium (still called cryptitis) ( $\times 600$ ). The single inflammatory cell (possibly eosinophil) in the lumen here is not considered as crypt abscess. D. Cryptitis with groups of neutrophils in the lumen, interpreted as a crypt abscess ( $\times 400$ ), although with minimal cryptal epithelial cell damage. E/F. Crypt abscess with cryptal epithelium destruction ( $\times 400$ ).
