# Supplementary material for: PICaSSO Histologic Remission Index (PHRI) in ulcerative colitis: development of a novel simplified histological score for monitoring mucosal healing and predicting clinical outcomes and its applicability in an artificial intelligence system
Source: HighWire-hosted journal article supplement (doi:10.1136/gutjnl-2021-326376), 2022-02-16
Supplement: gutjnl-2021-326376supp003_data_supplement.pdf [file gutjnl-2021-326376supp003_data_supplement.pdf]

**Supplementary Table 1. Modified scores for analysing correlations between histopathologic components and endoscopic scores / specified clinical outcomes**

| <b>Histopathologic component</b>                 | <b>Score</b> | <b>Source score(s)</b>                                                                                                                      |
|--------------------------------------------------|--------------|---------------------------------------------------------------------------------------------------------------------------------------------|
| a. Neutrophil infiltration in lamina propria     | 0<br>1<br>2  | If RHI-neutrophil-lamina propria = 0<br>If RHI-neutrophil-lamina propria $\leq 2$<br>If RHI-neutrophil-lamina propria = 3                   |
| b. Neutrophil infiltration in cryptal epithelium | 0<br>1<br>2  | If RHI-neutrophil-epithelium = 0<br>If RHI-neutrophil-epithelium $\leq 2$<br>If RHI-neutrophil-epithelium = 3                               |
| c. Neutrophil infiltration in total              | = (a + b)    |                                                                                                                                             |
| d. Chronic inflammation                          | 0<br>1<br>2  | If RHI-neutrophil-chronic inflammation = 0<br>If RHI-neutrophil-chronic inflammation $\leq 2$<br>If RHI-neutrophil-chronic inflammation = 3 |
| e. Combined active and chronic inflammation      | = (c + d)    |                                                                                                                                             |
| f. Basal plasmacytosis                           | 0, 1, 2      | Same subscore from ECAP                                                                                                                     |
| g. Eosinophil increase                           | 0, 1, 2      | Same subscore from ECAP                                                                                                                     |
| h. Crypt architecture distortion                 | 0<br>1<br>2  |                                                                                                                                             |
