# Supplementary material for: PICaSSO Histologic Remission Index (PHRI) in ulcerative colitis: development of a novel simplified histological score for monitoring mucosal healing and predicting clinical outcomes and its applicability in an artificial intelligence system
Source: HighWire-hosted journal article supplement (doi:10.1136/gutjnl-2021-326376), 2022-02-16
Supplement: gutjnl-2021-326376supp004_data_supplement.pdf [file gutjnl-2021-326376supp004_data_supplement.pdf]

**Supplementary Table 2. Comparison between PHRI\_total and PHRI\_max on their correlations with endoscopic scores and with specified clinical outcomes / relapse**

| <b>(A) All patients</b>            |                  |                   |                  |                   |
|------------------------------------|------------------|-------------------|------------------|-------------------|
| In correlation with                | PHRI_total       |                   | PHRI_max         |                   |
|                                    | <i>Pearson r</i> | <i>Spearman ρ</i> | <i>Pearson r</i> | <i>Spearman ρ</i> |
| PiCaSSO mucosal score              | 0.766534         | 0.819757          | 0.792444         | 0.809705          |
| PiCaSSO vascular score             | 0.722552         | 0.719359          | 0.711830         | 0.715309          |
| 6-mon specified clinical outcomes  | 0.471019         | 0.462178          | 0.428338         | 0.429286          |
| 12-mon specified clinical outcomes | 0.457633         | 0.437625          | 0.411784         | 0.403166          |

  

| <b>(B) MES 0 patients</b>          |                  |                   |                  |                   |
|------------------------------------|------------------|-------------------|------------------|-------------------|
| In correlation with                | PHRI_total       |                   | PHRI_max         |                   |
|                                    | <i>Pearson r</i> | <i>Spearman ρ</i> | <i>Pearson r</i> | <i>Spearman ρ</i> |
| PiCaSSO mucosal score              | 0.235775         | 0.237926          | 0.356568         | 0.243540          |
| PiCaSSO vascular score             | -0.009007        | 0.091234          | 0.041375         | 0.100339          |
| 6-mon specified clinical outcomes  | 0.133529         | 0.103149          | 0.086716         | 0.099161          |
| 12-mon specified clinical outcomes | 0.083656         | 0.034196          | 0.050836         | 0.031718          |
