# Supplementary material for: PICaSSO Histologic Remission Index (PHRI) in ulcerative colitis: development of a novel simplified histological score for monitoring mucosal healing and predicting clinical outcomes and its applicability in an artificial intelligence system
Source: HighWire-hosted journal article supplement (doi:10.1136/gutjnl-2021-326376), 2022-02-16
Supplement: gutjnl-2021-326376supp005_data_supplement.pdf [file gutjnl-2021-326376supp005_data_supplement.pdf]

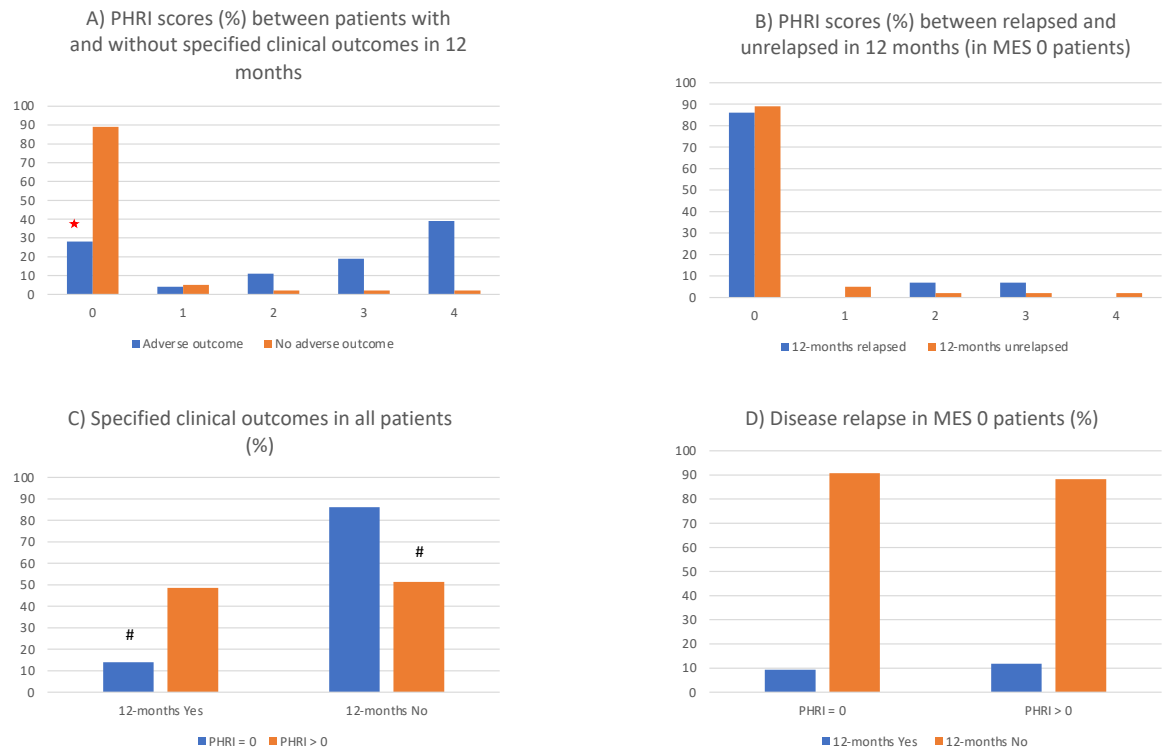

#### Supplementary figure 4.

A/B. Rate of adverse clinical outcomes (including relapse) according to PHRI scores. C/D. Comparison of the specified clinical outcome and relapse rates between patients with PHRI > 0 and those with PHRI = 0. C- all patients, D- MES 0 patients. \*  $p < 0.01$ , # $p < 0.00001$ .
