# Supplementary material for: PICaSSO Histologic Remission Index (PHRI) in ulcerative colitis: development of a novel simplified histological score for monitoring mucosal healing and predicting clinical outcomes and its applicability in an artificial intelligence system
Source: HighWire-hosted journal article supplement (doi:10.1136/gutjnl-2021-326376), 2022-02-16
Supplement: gutjnl-2021-326376supp006_data_supplement.pdf [file gutjnl-2021-326376supp006_data_supplement.pdf]

**Supplementary Table 3. Comparison between PHRI\_total and PHRI\_max on the difference between patients with and without specified clinical outcomes / relapse**

**(A) All patients**

|                                 | PHRI_total  |             | PHRI_max    |             |
|---------------------------------|-------------|-------------|-------------|-------------|
|                                 | 6 months    | 12 months   | 6 months    | 12 months   |
| w/ specified clinical outcomes  | 4.06 ± 3.05 | 3.75 ± 2.92 | 2.58 ± 1.60 | 2.36 ± 1.67 |
| w/o specified clinical outcomes | 2.09 ± 1.12 | 1.07 ± 2.02 | 0.87 ± 1.47 | 0.84 ± 1.46 |
| Wilcoxon test <i>p</i> value    | 1.173e-14   | 1.56e-12    | 7.528e-13   | 7.399e-11   |

**(B) MES 0 patients**

|                              | PHRI_total  |             | PHRI_max    |             |
|------------------------------|-------------|-------------|-------------|-------------|
|                              | 6 months    | 12 months   | 6 months    | 12 months   |
| w/ disease relapse           | 0.75 ± 1.75 | 0.50 ± 1.40 | 0.50 ± 1.07 | 0.36 ± 0.93 |
| w/o disease relapse          | 0.23 ± 0.78 | 0.25 ± 0.81 | 0.21 ± 0.71 | 0.22 ± 0.74 |
| Wilcoxon test <i>p</i> value | 0.1973      | 0.6849      | 0.2152      | 0.7069      |

Merged table. PHRI max only

|                                 | PHRI_max           |                |
|---------------------------------|--------------------|----------------|
|                                 | 12 months outcomes |                |
|                                 | All patients       | MES 0 patients |
| w/ specified clinical outcomes  | 2.36 ± 1.67        | 0.36 ± 0.93    |
| w/o specified clinical outcomes | 0.84 ± 1.46        | 0.22 ± 0.74    |
| Wilcoxon test <i>p</i> value    | 7.399e-11          | 0.7069         |
