# Supplementary material for: PICaSSO Histologic Remission Index (PHRI) in ulcerative colitis: development of a novel simplified histological score for monitoring mucosal healing and predicting clinical outcomes and its applicability in an artificial intelligence system
Source: HighWire-hosted journal article supplement (doi:10.1136/gutjnl-2021-326376), 2022-02-16
Supplement: gutjnl-2021-326376supp007_data_supplement.pdf [file gutjnl-2021-326376supp007_data_supplement.pdf]

## Supplementary Figure 2

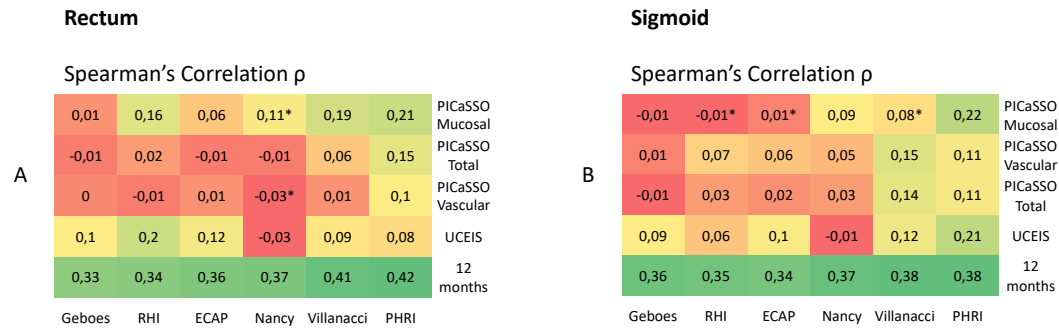

**Supplementary Figure 2** PHRI correlation in patients in endoscopic remission (MES 0) Histological-endoscopic correlation demonstrated by heatmaps showing Spearman correlation coefficients between different histological and endoscopic scores in the **rectum (A)** and in the **sigmoid (B)** and between the endoscopic-histological scores and the specified clinical outcomes at 12 months in patients in endoscopic remission (MES = 0). (0.8-1.0: very strong correlation, 0.6-0.79: strong, 0.40-0.59: moderate, 0.2-0.39: weak) (\*  $p < 0.05$  as compared to PHRI with regard to the correlation strength in the same category of correlation analysis)
