# Supplementary material for: PICaSSO Histologic Remission Index (PHRI) in ulcerative colitis: development of a novel simplified histological score for monitoring mucosal healing and predicting clinical outcomes and its applicability in an artificial intelligence system
Source: HighWire-hosted journal article supplement (doi:10.1136/gutjnl-2021-326376), 2022-02-16
Supplement: gutjnl-2021-326376supp009_data_supplement.pdf [file gutjnl-2021-326376supp009_data_supplement.pdf]

**Supplementary Table 4. Best cut-off values of PHRI in predicting specified clinical outcomes / relapse**

| <b>A. For all patients</b>                      |                       |                             |                             |                          |
|-------------------------------------------------|-----------------------|-----------------------------|-----------------------------|--------------------------|
| <b>For 6-month specified clinical outcomes</b>  |                       |                             |                             |                          |
| <b>Best value</b>                               | <b>AUROC (95% CI)</b> | <b>Specificity (95% CI)</b> | <b>Sensitivity (95% CI)</b> | <b>Accuracy (95% CI)</b> |
| PHRI_max ≤1                                     | 0.765 (0.701, 0.830)  | 0.766 (0.585, 0.828)        | 0.726 (0.531, 0.843)        | 0.757 (0.631, 0.806)     |
| PHRI_total ≤1                                   | 0.787 (0.721, 0.852)  | 0.761 (0.594, 0.849)        | 0.726 (0.565, 0.841)        | 0.754 (0.622, 0.825)     |
| PHRI_sigmoid ≤0                                 | 0.740 (0.673, 0.806)  | 0.814 (0.603, 0.897)        | 0.651 (0.516, 0.762)        | 0.777 (0.606, 0.841)     |
| PHRI_rectum ≤0                                  | 0.731 (0.664, 0.797)  | 0.795 (0.586, 0.868)        | 0.656 (0.504, 0.770)        | 0.763 (0.601, 0.819)     |
| <b>For 12-month specified clinical outcomes</b> |                       |                             |                             |                          |
| <b>Best value</b>                               | <b>AUROC (95% CI)</b> | <b>Specificity (95% CI)</b> | <b>Sensitivity (95% CI)</b> | <b>Accuracy (95% CI)</b> |
| PHRI_max ≤1                                     | 0.730 (0.665, 0.795)  | 0.781 (0.566, 0.845)        | 0.680 (0.462, 0.777)        | 0.752 (0.603, 0.794)     |
| PHRI_total ≤1                                   | 0.751 (0.685, 0.817)  | 0.775 (0.569, 0.844)        | 0.680 (0.502, 0.780)        | 0.748 (0.595, 0.798)     |
| PHRI_sigmoid ≤1                                 | 0.693 (0.628, 0.759)  | 0.868 (0.669, 0.915)        | 0.526 (0.320, 0.636)        | 0.770 (0.634, 0.804)     |
| PHRI_rectum ≤0                                  | 0.722 (0.659, 0.785)  | 0.814 (0.628, 0.888)        | 0.632 (0.471, 0.731)        | 0.761 (0.623, 0.814)     |
| <b>B. For patients in ER (MES 0)</b>            |                       |                             |                             |                          |
| <b>For 6-month specified clinical outcomes</b>  |                       |                             |                             |                          |
| <b>Best value</b>                               | <b>AUROC (95% CI)</b> | <b>Specificity (95% CI)</b> | <b>Sensitivity (95% CI)</b> | <b>Accuracy (95% CI)</b> |
| PHRI_max ≤0                                     | 0.575 (0.408, 0.741)  | 0.894 (0.656, 1.000)        | 0.250 (0.000, 0.518)        | 0.862 (0.640, 0.962)     |
| PHRI_total ≤0                                   | 0.575 (0.408, 0.741)  | 0.894 (0.656, 1.000)        | 0.250 (0.000, 0.518)        | 0.754 (0.640, 0.962)     |
| PHRI_sigmoid ≤0                                 | 0.598 (0.437, 0.759)  | 0.947 (0.700, 0.993)        | 0.250 (0.000, 0.625)        | 0.912 (0.678, 0.956)     |
| PHRI_rectum ≤1                                  | 0.531 (0.404, 0.657)  | 0.967 (0.794, 0.993)        | 0.125 (0.000, 0.375)        | 0.925 (0.755, 0.950)     |
| <b>For 12-month specified clinical outcomes</b> |                       |                             |                             |                          |
| <b>Best value</b>                               | <b>AUROC (95% CI)</b> | <b>Specificity (95% CI)</b> | <b>Sensitivity (95% CI)</b> | <b>Accuracy (95% CI)</b> |
| PHRI_max ≤1                                     | 0.517 (0.415, 0.619)  | 0.939 (0.566, 0.845)        | 0.143 (0.000, 0.357)        | 0.863 (0.683, 0.904)     |
| PHRI_total ≤1                                   | 0.519 (0.415, 0.622)  | 0.939 (0.740, 1.000)        | 0.143 (0.000, 0.286)        | 0.863 (0.677, 0.918)     |
| PHRI_sigmoid ≤2                                 | 0.506 (0.432, 0.581)  | 0.977 (0.844, 1.000)        | 0.071 (0.000, 0.214)        | 0.890 (0.770, 0.911)     |
| PHRI_rectum ≤1                                  | 0.539 (0.440, 0.639)  | 0.970 (0.780, 0.992)        | 0.143 (0.000, 0.286)        | 0.891 (0.725, 0.912)     |
