# Supplementary material for: PICaSSO Histologic Remission Index (PHRI) in ulcerative colitis: development of a novel simplified histological score for monitoring mucosal healing and predicting clinical outcomes and its applicability in an artificial intelligence system
Source: HighWire-hosted journal article supplement (doi:10.1136/gutjnl-2021-326376), 2022-02-16
Supplement: gutjnl-2021-326376supp010_data_supplement.pdf [file gutjnl-2021-326376supp010_data_supplement.pdf]

**Supplementary Table 5. Inter-rater agreement on different histological scores and their components**

| Histologic Index/Score           |                                                                 | Intra-Class Correlation (ICC) Coefficient, overall (95% CI) |                   |
|----------------------------------|-----------------------------------------------------------------|-------------------------------------------------------------|-------------------|
| Name                             | Histologic Components                                           | ICC                                                         | Total ICC         |
| PHRI                             | Neutrophils in lamina propria                                   | <b>0.85</b> (0.78, 0.90)                                    | 0.84 (0.78, 0.90) |
|                                  | Neutrophils in surface epithelium                               | <b>0.70</b> (0.60, 0.79)                                    |                   |
|                                  | Cryptitis                                                       | 0.66 (0.55, 0.76)                                           |                   |
|                                  | Crypt abscess                                                   | 0.63 (0.51, 0.73)                                           |                   |
| RHI                              | Chronic inflammation                                            | 0.68 (0.57, 0.76)                                           | 0.77 (0.69, 0.85) |
|                                  | Neutrophils in lamina propria                                   | <b>0.80</b> (0.72, 0.87)                                    |                   |
|                                  | Neutrophils in epithelium                                       | <b>0.72</b> (0.63, 0.81)                                    |                   |
|                                  | Erosion / Ulceration                                            | 0.62 (0.51, 0.73)                                           |                   |
| NHI*                             |                                                                 |                                                             | 0.85 (0.79, 0.90) |
| VSS                              | Crypt abscess                                                   | 0.51 (0.39, 0.64)                                           | 0.77 (0.68, 0.84) |
|                                  | Erosion / Ulceration                                            | 0.44 (0.32, 0.58)                                           |                   |
|                                  | Neutrophils in lamina propria                                   | <b>0.79</b> (0.71, 0.86)                                    |                   |
| ECAP                             | Extent                                                          | 0.55 (0.43, 0.67)                                           | 0.87 (0.82, 0.92) |
|                                  | Crypt architectural alteration                                  | 0.44 (0.32, 0.58)                                           |                   |
|                                  | Paneth cell metaplasia/hyperplasia                              | 0.41 (0.29, 0.55)                                           |                   |
|                                  | Surface epithelium (reactive, neutrophils, erosion /ulceration) | 0.73 (0.64, 0.82)                                           |                   |
|                                  | Cryptitis                                                       | 0.69 (0.58, 0.78)                                           |                   |
|                                  | Crypt abscess                                                   | 0.55 (0.44, 0.68)                                           |                   |
|                                  | Crypt destruction                                               | 0.47 (0.34, 0.60)                                           |                   |
|                                  | Mononuclear cells in lamina propria                             | 0.74 (0.64, 0.82)                                           |                   |
|                                  | Basal plasmacytosis                                             | 0.68 (0.58, 0.78)                                           |                   |
|                                  | Neutrophils in lamina propria                                   | <b>0.85</b> (0.78, 0.90)                                    |                   |
|                                  | Eosinophils in lamina propria                                   | 0.42 (0.30, 0.56)                                           |                   |
| Lymphoid follicles or aggregates | 0.43 (0.31, 0.57)                                               |                                                             |                   |
| GS                               | Grade 0 (architectural change)                                  | 0.59 (0.47, 0.71)                                           | 0.82 (0.75, 0.88) |
|                                  | Grade 1 (chronic inflammatory infiltrate)                       | 0.68 (0.57, 0.77)                                           |                   |
|                                  | Grade 2a (eosinophils in lamina propria)                        | 0.40 (0.28, 0.53)                                           |                   |
|                                  | Grade 2b (neutrophils in lamina propria)                        | <b>0.80</b> (0.62, 0.87)                                    |                   |
|                                  | Grade 3 (neutrophils in epithelium)                             | <b>0.71</b> (0.61, 0.80)                                    |                   |
|                                  | Grade 4 (crypt destruction)                                     | 0.55 (0.43, 0.67)                                           |                   |
|                                  | Grade 5 (erosion / ulceration)                                  | 0.60 (0.49, 0.71)                                           |                   |

\*Breakdown ICC data for Nancy index was not computed
